1 **Feasibility and Sensitivity of Saliva GeneXpert MTB/RIF Ultra for Tuberculosis Diagnosis**  
2 **in Adults in Uganda**

3  
4 Patrick Byanyima<sup>1</sup>, Sylvia Kaswabuli<sup>1</sup>, Emmanuel Musisi<sup>2</sup>, Catherine Nabakiibi<sup>1</sup>, Josephine  
5 Zawedde<sup>1</sup>, Ingvar Sanyu<sup>1</sup>, Abdul Sessolo<sup>1</sup>, Alfred Andama<sup>1,5</sup>, William Worodria<sup>1,5</sup>, Laurence  
6 Huang<sup>3,4</sup>, J. Lucian Davis<sup>6,7</sup>

- 7  
8 1. Infectious Diseases Research Collaboration, Kampala, Uganda  
9 2. Division of Infection and Global Health, School of Medicine, University of St. Andrews, UK  
10 3. Division of Pulmonary and Critical Care Medicine, University of California San Francisco,  
11 San Francisco, California, USA  
12 4. Division of HIV, Infectious Diseases, and Global Medicine, University of California San  
13 Francisco, San Francisco, California, USA  
14 5. Department of Internal Medicine, Makerere University College of Health Sciences, Uganda  
15 6. Department of Epidemiology of Microbial Diseases, Yale School of Public Health, New  
16 Haven, Connecticut, USA  
17 7. Pulmonary, Critical Care, and Sleep Medicine Section, Yale School of Medicine, New  
18 Haven, Connecticut, USA

19  
20 Running Head: Saliva TB NAAT in Uganda

21 Word Count (Main Text): 2533 words

1 **ABSTRACT**

2 The objective of this prospective, observational study carried out at China-Uganda Friendship  
3 Hospital-Naguru in Kampala, Uganda, was to determine the performance of GeneXpert  
4 MTB/RIF Ultra (Xpert) testing on saliva for active tuberculosis (TB) disease among consecutive  
5 adults undergoing diagnostic evaluation. We calculated sensitivity to determine the diagnostic  
6 performance in comparison to that of the composite reference standard of *Mycobacterium*  
7 *tuberculosis* liquid and solid cultures on two spot sputum specimens. GeneXpert Ultra on saliva  
8 had a sensitivity of 90% (95% confidence interval [CI], 81-96%); this was similar to that of  
9 sputum fluorescence smear microscopy (FM) of 87% (95% CI, 77-94%). Sensitivity was 24%  
10 lower (95% CI for difference 2-48%, p=0.003) among persons living with HIV (71%, 95% CI 44-  
11 90%) than among persons living without HIV (95%, 95% CI 86-99%) and 46% lower (95% CI  
12 for difference 14-77%, p<0.0001) among sputum microscopy positive (96%, 95% CI 87-99%)  
13 than among sputum microscopy negative patients (50%, 95% CI 19-81%). Semi-quantitative  
14 Xpert grade was higher in sputum than in paired saliva samples from the same patient. In  
15 conclusion, saliva specimens appear to be feasible and similarly sensitive to sputum for active  
16 TB diagnosis using molecular testing, suggesting promise as a non-sputum diagnostic test for  
17 active TB in high-burden settings.

18

19 Word Count (Abstract): 202 words (Limit 250)

## 1 INTRODUCTION

2  
3  
4  
5  
6  
7  
8  
9  
10  
11  
12  
13  
14  
15  
16  
17  
18  
19  
20  
21  
22  
23  
Over the last quarter century, improvements in diagnosis and treatment of people with tuberculosis (TB) have gradually reduced mortality, but large gaps in detection and treatment persist that contribute to substantial ongoing morbidity and mortality [1]. Among several available strategies to facilitate rapid, same-day diagnosis of TB, testing sputum with the GeneXpert MTB/RIF Ultra molecular assay [2, 3] is the most sensitive and most readily available approach. Unfortunately, there are several operational challenges associated with collecting sputum for diagnosis of pulmonary TB. First, coughing during sputum expectoration or sputum induction generates aerosols that may facilitate TB transmission [4]. Second, some individuals are unable to produce sputum, including young children, those with dry cough, and the severely ill/severely debilitated. Given these limitations of sputum for TB diagnosis, in 2014 the World Health Organization (WHO) issued guidelines for developers of a future non-sputum test for active TB diagnosis, including a target product profile suggesting that it should have a minimum diagnostic accuracy similar to sputum GeneXpert MTB/RIF on sputum smear-negative individuals (*i.e.*, sensitivity  $\geq 68\%$ , specificity  $\geq 98\%$ ) [5].

One alternative sample type with great promise for diagnosis of pulmonary TB is saliva, which is easy to collect, with minimal risk of generating aerosols. Although Stop TB Partnership guidelines discourage collection of salivary sputum samples because they have lower diagnostic yield for acid-fast bacilli (AFB) by microscopy or culture, the diagnostic yield of TB molecular testing appears to be more promising. In a previous study of 1782 smear-negative adults undergoing evaluation for active TB, for example, we found that salivary sputum provided a substantially higher diagnostic yield and sensitivity for culture-positive TB than other sputum

24 types, implying incremental value to using oral samples at least as a supplement to sputum [6].  
25 Using a different sampling technique, oral swabs, Wood and colleagues showed that oral nylon  
26 swabs repeatedly tested positive for TB via IS6110 polymerase chain reaction testing in 90% of  
27 South African patients with TB confirmed by sputum GeneXpert MTB/RIF testing, suggesting  
28 that TB is present in the oral cavity [7]. A subsequent study of 50 adults with possible TB in  
29 Uganda found similar sensitivity of 88%, albeit with lower specificity. Saliva is also now widely  
30 used for molecular diagnosis of COVID-19, where it has high sensitivity, even among patients  
31 without symptoms [8]. Using saliva as a diagnostic specimen in the COVID-19 context has been  
32 shown to reduce aerosol exposure for health workers and eliminate the need for personal  
33 protective equipment because it is self-collected [9]. This raises the possibility that saliva alone  
34 could be used as a TB diagnostic when paired with next generation and ultra-sensitive molecular  
35 tests (GeneXpert MTB/RIF Ultra). Thus, the aim of this study was to evaluate the feasibility and  
36 sensitivity of GeneXpert MTB/RIF on saliva among symptomatic adult TB confirmed patients.

37

## 38 **MATERIALS AND METHODS**

39 *Study design & Population.* Between June 2018 and May 2019, we carried out a prospective,  
40 observational study to determine the performance of GeneXpert MTB/RIF Ultra (Xpert) testing  
41 on saliva for diagnosis of active TB. This was a sub-study nested within the Mulago Inpatient  
42 Non-invasive Diagnosis of Pneumonia–Inflammation Aging, Microbes, and Obstructive Lung  
43 Disease (I AM OLD) study. We enrolled consecutive adults (age  $\geq 18$  years) with cough of any  
44 duration but  $< 6$  months who were also undergoing TB evaluation (including HIV testing, chest  
45 radiography, and sputum examination) as inpatients or outpatients at China-Uganda Friendship  
46 Hospital-Naguru in Kampala, Uganda; patients with a prior history of TB within the past two

47 years and those receiving treatment for active TB at the time of presentation were excluded. In  
48 this sub-study, we included consecutive patients with positive sputum Xpert results at any semi-  
49 quantitative threshold.

50

51 ***Measurements and Study Procedures:*** After obtaining written informed consent from  
52 participants, a study nurse collected demographic and clinical information using a structured  
53 questionnaire, and then provided standardized instructions to expectorate sputum into three  
54 separate cups “on the spot” [10]. Trained study staff examined the first sample using direct  
55 auramine-O fluorescence microscopy (FM) [11, 12] and sent the remaining sample for  
56 mycobacterial culture and speciaion on Lowenstein-Jensen (LJ) solid media and in  
57 Mycobacterial Growth Indicator Tube (MGIT) liquid media, the accepted microbiologic  
58 reference standard assays for TB. Staff examined the second sample using direct FM and  
59 performed GeneXpert MTB/RIF testing on the remainder [13]. Finally, staff sent a third sputum  
60 sample for mycobacterial culture on solid media and liquid culture.. All cultures were performed  
61 at the Makerere University Mycobacteriology Laboratory, and staff performing the cultures were  
62 not provided with clinical information about the study participants. At least two hours after  
63 sputum collection, the patients were asked to submit at least 1 mL of saliva placed into a sterile  
64 specimen cup for GeneXpert MTB/RIF testing; all participants were instructed not to cough prior  
65 to saliva collection. Saliva specimens were processed for GeneXpert MTB/RIF using a sample  
66 reagent to saliva volume ratio of 1:1, and all other steps followed the manufacturer’s  
67 recommendations for extra-pulmonary body fluid specimens [13]. Sputum was collected prior to  
68 TB treatment initiation, and saliva was collected prior to or within two hours of TB treatment  
69 initiation. Finally, all participants without a prior known HIV diagnosis were offered HIV testing

70 and counseling, and for those found to be living with HIV, a CD4+ T-cell count was performed  
71 at the Makerere University–Johns Hopkins University Research Collaboration (MU-JHU)  
72 laboratory.

73

74 **Statistical Analysis:** We examined baseline characteristics using proportions for categorical  
75 variables, and medians for continuous variables. We calculated sensitivity for GeneXpert  
76 MTB/RIF results on saliva and on sputum in reference to a composite reference standard  
77 described as follows: those with  $\geq 1$  sputum sample culture-positive were defined as  
78 *Mycobacterium tuberculosis (Mtb)* positive, those with two negative cultures were defined as  
79 negative, and all others were defined as indeterminate. We estimated precision using exact  
80 binomial 95% confidence intervals. We explored comparisons of diagnostic accuracy results  
81 (sensitivity differences with 95% CI) and semi-quantitative results (Fisher’s exact test) for saliva  
82 GeneXpert by sputum smear microscopy and HIV status. We estimated that a sample size of 84  
83 patients would enable us to determine if the sensitivity of saliva GeneXpert MTB/RIF was 75%  
84 or higher with a precision of  $\pm 10\%$ , allowing for up to 10% indeterminate results due to missing or  
85 contaminated sputum culture results. We used STATA 14.0 (Stata Corporation, College Station,  
86 TX) for all statistical analyses.

87

88 **Human subjects protection.** The study protocol was reviewed and approved by the Yale  
89 University and the University of California San Francisco Institutional Review Boards, the  
90 Makerere University School of Medicine Research Ethics Committee, the Mulago Hospital  
91 Institutional Review Board, and the Uganda National Council for Science and Technology.

92

93 **Data sharing.** A comprehensive, de-identified dataset containing individual-level data will be  
94 made available prior to publication.

## 95 **RESULTS**

96 **Study Population.** Among 153 participants enrolled into the parent study between June 2018 and  
97 June 2019, 40 were GeneXpert MTB/RIF negative; 15 did not have sputum GeneXpert  
98 MTB/RIF performed; 16 did not provide a saliva specimen; and one participant had an  
99 indeterminate culture result, (Figure 1) leaving 81 participants for inclusion in the analysis.  
100 There were no adverse events during specimen collection. Median age of participants was 30  
101 years (interquartile range 24-38), 50 (62%) were men. 18 (22%) were persons living with HIV,  
102 with median CD4 cell count 90 cells/uL (interquartile range 49-234), and only seven of the 18  
103 (39%) were taking antiretroviral therapy at enrolment. 17 (21%) had ever smoked  $\geq 100$   
104 cigarettes in their entire life and 60 (74%) had a history of alcohol use. 17 (21%) had a cough  
105 greater than two weeks, while 71 (88%) reported subjective fever within the past seven days. 75  
106 (93%) reported weight loss, including 46 (57%) with weight loss  $\geq 5$  kg. 14 (17%) reported no  
107 ambulatory limitation; 47 (58%) were mildly limited with ambulation, and 20 (25%) were  
108 severely affected but not bedbound. 67 patients (83%) were AFB smear-positive, including 30  
109 (37%) with an AFB microscopy smear grade of 3+, 18 (22%) with a grade of 2+, nine (11%) 1+,  
110 and 10 (12%) had 1-9 AFB seen per 100 high-powered fields. 13 (16%) were AFB smear-  
111 negative and one (1%) was missing an AFB smear microscopy result (Table 1).

112

113 **Diagnostic Performance.** Seventy-eight patients were confirmed *Mtb* culture-positive on liquid  
114 and/or solid media, while three were *Mtb* culture-negative. Seventy-three of the 78 patients with  
115 culture-confirmed TB were salivary GeneXpert MTB/RIF positive, giving an overall sensitivity

116 of GeneXpert MTB/RIF on saliva of 90% (95% Confidence Interval (CI) 81-96%). This  
117 sensitivity was similar to that of sputum smear microscopy, which had a sensitivity of 87% (95%  
118 CI 77-94%) in reference to the combined culture reference standard. Among the three *Mtb*  
119 culture-negative patients, two were salivary GeneXpert positive. Sensitivity was 24% lower  
120 (95% CI for difference 2-48%,  $p=0.003$ ) among persons living with HIV (71%, 95% CI 44-90%)  
121 than among persons living without HIV (95%, 95% CI 86-99%), and 46% lower (95% CI for  
122 difference 14-77%,  $p<0.0001$ ) among sputum microscopy positive (96%, 95% CI 87-99%) than  
123 among sputum microscopy negative patients (50%, 95% CI 19-81%).

124  
125 We also compared the semi-quantitative results of bacilli by GeneXpert for both saliva and  
126 sputum, as shown in Table 2. Overall, the semi-quantitative GeneXpert grade was higher in  
127 sputum samples than in paired saliva samples collected from the same patient: 56 of 72 (78%) of  
128 the sputum samples of either medium ( $n=22$ ) or high ( $n=34$ ) semi-quantitative grade, whereas  
129 only 14 of 72 (19%) of the saliva samples were of either medium ( $n=10$ ) or high ( $n=4$ ) grade,  
130 indicating that the mycobacterial load in the saliva specimens was low overall. There was no  
131 difference in semi-quantitative results by smear microscopy result ( $p=0.52$ ) or by HIV status  
132 ( $p=0.39$ ).

133  
134 **DISCUSSION**

135 In a prospective, observational study of consecutive sputum GeneXpert-positive TB patients in a  
136 high-burden setting, we showed that diagnosis of TB using GeneXpert Ultra on saliva is feasible  
137 and had a high sensitivity relative to a rigorously defined reference standard. This finding has  
138 significant implications for the diagnosis of TB and potentially also for TB infection control.



139 Using sputum specimens for TB diagnosis poses a number of challenges, since some individuals  
140 such as those with non-productive cough and young children find expectoration challenging, and  
141 the associated generation of sputum aerosols poses an infection control risk for health care  
142 workers and nearby patients [14]. The development of novel testing strategies that employ non-  
143 sputum samples for TB has been identified as a priority by the WHO, and the sensitivity  
144 measured in our study is consistent with WHO's minimum target-product profile for a non-  
145 sputum-based test, with similar sensitivity to sputum GeneXpert among a population of  
146 predominantly sputum microscopy-positive and HIV-negative individuals. Although our  
147 alternative strategy of salivary GeneXpert exceeds WHO's optimal targets for cost (\$4) and turn-  
148 around time (20 minutes) for a non-sputum-based test, if GeneXpert on saliva were shown to  
149 perform well in populations for whom sputum collection is less feasible for the reasons described  
150 above, the willingness to pay for and wait for results might be higher.

151  
152 The use of saliva for molecular diagnosis of TB was first described in a convenience sample of  
153 52 adult TB patients in Japan who were evaluated using a lab-developed, nested PCR assay that  
154 was shown to have a sensitivity of 98% [15]. A more recent study of 44 sputum smear- and  
155 culture-positive TB patients, including 35 in South Africa and 9 in South Korea, reported on  
156 saliva as having a very low sensitivity of 39% for TB testing [16]. Sputum mycobacterial load  
157 was similarly high (100% smear-positive in the South Africa/South Korea study vs. 87% in our  
158 study), so these differences in diagnostic performance might be attributable to differences in  
159 either sample collection or specimen processing. For example, participants were instructed to  
160 rinse their mouths prior to specimen collection in the South Africa/South Korea study but not in  
161 our study. Second, the South Africa/South Korea study diluted one part of the sample in two

162 parts of sample reagent as recommended by the manufacturer for sputum, while we used a 1:1  
163 dilution ratio as recommended for cerebrospinal fluid, another extra-pulmonary specimen  
164 without a mucoid matrix [17]. Finally, we used the GeneXpert MTB/RIF Ultra cartridge, which  
165 has ten-fold better analytic sensitivity than the earlier generation GeneXpert MTB/RIF cartridge.  
166 To our knowledge, we are among the first to report the performance of GeneXpert MTB/RIF  
167 Ultra on saliva.

168  
169 Previous studies have examined the sensitivity of a variety of oral specimens for diagnosis of  
170 TB. We previously showed that oropharyngeal wash specimens paired with a lab-developed PCR  
171 assay had a high sensitivity for TB diagnosis in reference to sputum mycobacterial culture on  
172 previously frozen and thawed sputum, but a subsequent study failed to confirm these results [18,  
173 19]. A study of *Mtb* PCR on buccal swabs of South African TB patients and US controls showed  
174 high sensitivity (90%) and specificity (100%), although the case-control design may have  
175 inflated diagnostic accuracy [7]. A recent study from the US was among the first to show that  
176 saliva is a viable and accurate specimen for diagnosis of SARS-CoV2, and more sensitive and  
177 less variable than nasopharyngeal swab specimens [20]. Another study carried out in Thailand  
178 using saliva for diagnosis of SARS-CoV2 showed similar results, with saliva providing a  
179 sensitivity of 84% and a specificity of 99% [21]. Collectively, these studies suggest that saliva is  
180 a very promising novel specimen for diagnosis of respiratory tract infections.

181  
182 There were a few limitations to our study. First, because the primary study objective was to  
183 evaluate feasibility and preliminary sensitivity, we did not include patients with non-productive  
184 cough or children, two ideal target populations for salivary testing. If, as seems plausible, these

185 populations have more paucibacillary disease, diagnostic sensitivity could be lower in these  
186 populations, as suggested by the lower sensitivity observed among sputum smear-negative  
187 individuals and persons living with HIV. However, in the current study, we found that even  
188 though saliva is more paucibacillary than sputum as assessed by GeneXpert's semi-quantitative  
189 measurement of mycobacterial load, diagnostic sensitivity was similar between the two specimen  
190 types, likely because of the extremely low threshold of analytic sensitivity of the GeneXpert  
191 Ultra assay [22]. Secondly, to conserve costs in this preliminary study, we did not enroll non-TB  
192 patients to serve as controls, a choice that prevented us from estimating diagnostic specificity.  
193 However, a recent systematic review found that both GeneXpert MTB/RIF assays have a high  
194 specificity on a variety of body fluid types [23]. Thirdly, our sample size was small, especially  
195 for persons living with HIV and for sputum smear-negative patients, which limited our ability to  
196 develop precise accuracy estimates for these and other subgroups.

197  
198 In conclusion, saliva appears to be a feasible specimen for TB diagnosis using GeneXpert Ultra,  
199 with a similar diagnostic sensitivity to sputum GeneXpert Ultra, at least among HIV-negative  
200 and sputum smear-positive individuals. and thus appear to be a very promising alternative non-  
201 sputum diagnostic test for active TB in high-burden settings. Future studies should examine  
202 sensitivity in populations who are most likely to benefit from this test, including individuals who  
203 are unable to expectorate sputum, children, and individuals from populations with a broad  
204 spectrum of mycobacterial load and disease severity, and symptomatic individuals without TB,  
205 including persons living with HIV. Direct comparisons of saliva to other oral sampling methods,  
206 including swabs, would also be useful. Finally, studies evaluating the relative impacts of salivary  
207 versus sputum testing on infection control proxies and/or on outcomes would also be valuable.

208 **ACKNOWLEDGMENTS**

209 The authors would like to acknowledge the patients who participated in the study and the  
210 administration and TB clinic staff of the China-Uganda Friendship Hospital where the study took  
211 place.

212

213 **FUNDING**

214 This work was supported in part by NIH D43 TW009607 (JLD), the Pulmonary Complications  
215 of AIDS Research Training (PART) program; and by NIH K24 HL087713 (LH) and R01  
216 HL128156 (LH).

## REFERENCES

1. WHO, *Global tuberculosis report 2018*. 2018: Geneva.
2. Horne, D.J., et al., *Xpert MTB/RIF and Xpert MTB/RIF Ultra for pulmonary tuberculosis and rifampicin resistance in adults*. Cochrane Database of Systematic Reviews, 2019(6).
3. Di Tanna, G.L., et al., *Effect of Xpert MTB/RIF on clinical outcomes in routine care settings: individual patient data meta-analysis*. The Lancet Global Health, 2019. **7**(2): p. e191-e199.
4. Jones-López, E.C., et al., *Cough aerosols of Mycobacterium tuberculosis predict new infection. A household contact study*. American journal of respiratory and critical care medicine, 2013. **187**(9): p. 1007-1015.
5. Profiles, W.H.-P.T.P., *for New Tuberculosis Diagnostics: Report of a Consensus Meeting*. Geneva: World Health Organisation, 2014.
6. Meyer, A.J., et al., *Sputum quality and diagnostic performance of GeneXpert MTB/RIF among smear-negative adults with presumed tuberculosis in Uganda*. PLoS One, 2017. **12**(7).
7. Wood, R.C., et al., *Detection of Mycobacterium tuberculosis DNA on the oral mucosa of tuberculosis patients*. Scientific reports, 2015. **5**: p. 8668-8668.
8. Wyllie, A.L., et al., *Saliva or nasopharyngeal swab specimens for detection of SARS-CoV-2*. New England Journal of Medicine, 2020. **383**(13): p. 1283-1286.
9. Johnson, A.J., et al., *Saliva Testing Is Accurate for Early-Stage and Presymptomatic COVID-19*. 2021. **9**(1): p. e0008621.
10. Khan, M.S., et al., *Improvement of tuberculosis case detection and reduction of discrepancies between men and women by simple sputum-submission instructions: a pragmatic randomised controlled trial*. The Lancet, 2007. **369**(9577): p. 1955-1960.
11. Kent, P.T., *Public health mycobacteriology: a guide for the level III laboratory*. 1985: US Department of Health and Human Services, Public Health Service, Centers ....
12. McCarter, Y.S. and A. Robinson, *Detection of acid-fast bacilli in concentrated primary specimen smears stained with rhodamine-auramine at room temperature and at 37 degrees C*. Journal of clinical microbiology, 1994. **32**(10): p. 2487-2489.

13. Hillemann, D., et al., *Rapid Molecular Detection of Extrapulmonary Tuberculosis by the Automated GeneXpert MTB/RIF System*. Journal of Clinical Microbiology, 2011. **49**(4): p. 1202.
14. Namuganga, A.R., et al., *Suitability of saliva for Tuberculosis diagnosis: comparing with serum*. BMC infectious diseases, 2017. **17**(1): p. 600-600.
15. Eguchi, J., et al., *PCR method is essential for detecting Mycobacterium tuberculosis in oral cavity samples*. Oral microbiology and immunology, 2003. **18**(3): p. 156-159.
16. Shenai, S., et al., *Exploring Alternative Biomaterials for Diagnosis of Pulmonary Tuberculosis in HIV-Negative Patients by Use of the GeneXpert MTB/RIF Assay*. Journal of Clinical Microbiology, 2013. **51**(12): p. 4161-4166.
17. Organization, W.H., *Xpert MTB/RIF implementation manual: technical and operational 'how-to'; practical considerations*. 2014, World Health Organization.
18. Davis, J.L., et al., *Polymerase chain reaction of secA1 on sputum or oral wash samples for the diagnosis of pulmonary tuberculosis*. Clinical infectious diseases, 2009. **48**(6): p. 725-732.
19. Davis, J.L., et al., *Nucleic acid amplification tests for diagnosis of smear-negative TB in a high HIV-prevalence setting: a prospective cohort study*. PLoS One, 2011. **6**(1): p. e16321.
20. Wyllie, A.L., et al., *Saliva or Nasopharyngeal Swab Specimens for Detection of SARS-CoV-2*. New England Journal of Medicine, 2020. **383**(13): p. 1283-1286.
21. Pasomsub, E., et al., *Saliva sample as a non-invasive specimen for the diagnosis of coronavirus disease 2019: a cross-sectional study*. Clinical Microbiology and Infection, 2021. **27**(2): p. 285.e1-285.e4.
22. Chakravorty, S., et al., *The New Xpert MTB/RIF Ultra: Improving Detection of Mycobacterium tuberculosis and Resistance to Rifampin in an Assay Suitable for Point-of-Care Testing*. MBio, 2017. **8**(4).
23. Kohli, M., et al., *Xpert MTB/RIF Ultra and Xpert MTB/RIF assays for extrapulmonary tuberculosis and rifampicin resistance in adults*. Cochrane Database Syst Rev, 2021. **1**(1): p. Cd012768.

## **FIGURES AND TABLES**

**FIGURE 1.** Flow diagram showing study enrollment and TB testing results.

**Legend:** Patients missing index test results due to a missing saliva sample and patients with missing reference standard results due indeterminate culture results were excluded from analysis.

**TABLE 1.** Demographic and clinical characteristics.

| <b>Characteristic (n=81)</b>                   | <b>n (%)*</b> |
|------------------------------------------------|---------------|
| Age, median years (Q1-Q3)                      | 30(24-38)     |
| Men                                            | 50 (62)       |
| Inpatients                                     | 8 (9)         |
| Persons living with HIV                        | 18(22)        |
| CD4+ T-cell count, median cells/mL (Q1-Q3)     | 90 (49-234)   |
| Taking antiretroviral therapy at enrollment    | 7 (39)        |
| Smoking history                                | 17 (21)       |
| Alcohol use                                    | 60 (74)       |
| Cough of any duration                          | 81 (100)      |
| Cough for $\geq$ 14 days                       | 17 (21)       |
| Fever within the past 7 days                   | 71 (88)       |
| Weight loss                                    | 75 (93)       |
| Difficulty in breathing within the past 7 days | 46 (47)       |
| Clinical status                                |               |
| Ambulatory, unaffected                         | 14 (17)       |
| Ambulatory, mildly affected                    | 47 (58)       |
| Bedbound, moderately affected                  | 12(15)        |
| Bedbound, severely affected                    | 8 (10)        |
| Sputum AFB microscopy grade <sup>†</sup>       |               |
| 3+                                             | 30 (37)       |
| 2+                                             | 18(22)        |
| 1+                                             | 9 (11)        |
| 1-9 per 100 hpf                                | 10 (12)       |
| Negative                                       | 13 (16)       |

**Abbreviations:** AFB, acid-fast bacilli; hpf, high-powered fields; Q1, 25% quartile; Q3, 75% quartile. TB, tuberculosis.

**Legend:** \*Unless otherwise specified; <sup>†</sup>1 result missing



**TABLE 2.** Within-individual comparisons of semi-quantitative GeneXpert MTB/RIF Ultra results between sputum and saliva, among those with positive test results on both sample types (n=72).

|                             |  | <b>Saliva Xpert Results</b> |          |     |          |      |
|-----------------------------|--|-----------------------------|----------|-----|----------|------|
| <b>Sputum Xpert Results</b> |  | Trace                       | Very Low | Low | Moderate | High |
| Trace                       |  | 0                           | 0        | 0   | 0        | 0    |
| Very Low                    |  | 0                           | 0        | 1   | 0        | 0    |
| Low                         |  | 2                           | 5        | 6   | 0        | 2    |
| Moderate                    |  | 0                           | 4        | 15  | 2        | 1    |
| High                        |  | 2                           | 3        | 20  | 8        | 1    |

**Legend:** Shading intensity is proportional to the frequency of paired results by semi-quantitative grade across the two sample types.

153 patients enrolled in parent study

40 sputum GeneXpert negative  
15 sputum GeneXpert not done

98 patients eligible

16 did not provide saliva

82 GeneXpert-positive patients with  
sputum mycobacterial culture results

1 sputum culture indeterminate

81 patients analyzed

medRxiv preprint doi: <https://doi.org/10.1101/2022.03.16.22272031>; this version posted March 18, 2022. The copyright holder for this preprint (which was not certified by peer review) is the author/funder, who has granted medRxiv a license to display the preprint in perpetuity. It is made available under a [CC-BY 4.0 International license](https://creativecommons.org/licenses/by/4.0/).
